# Supplementary material for: Validity of Wrist-Wearable Activity Devices for Estimating Physical Activity in Adolescents: Comparative Study
Source: PubMed Central journal article supplement (PMC7819784; doi:10.2196/18320), 2021-01-07
Supplement: mhealth_v9i1e18320_app1.pdf [file mhealth_v9i1e18320_app1.pdf]

Steps:

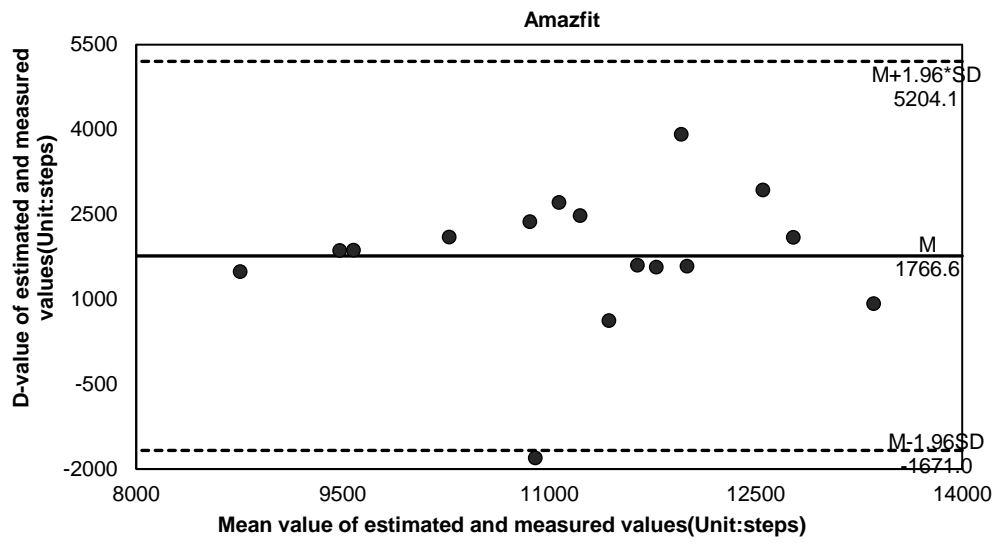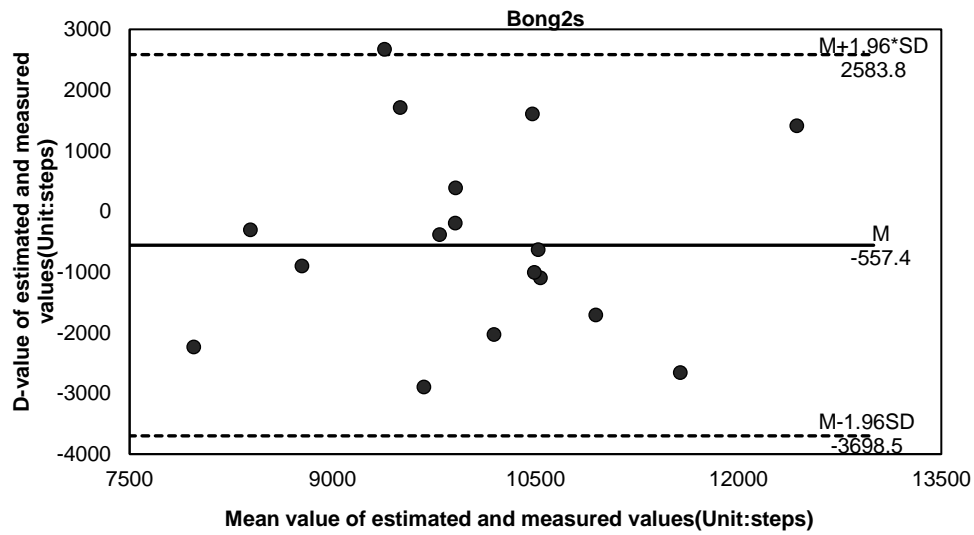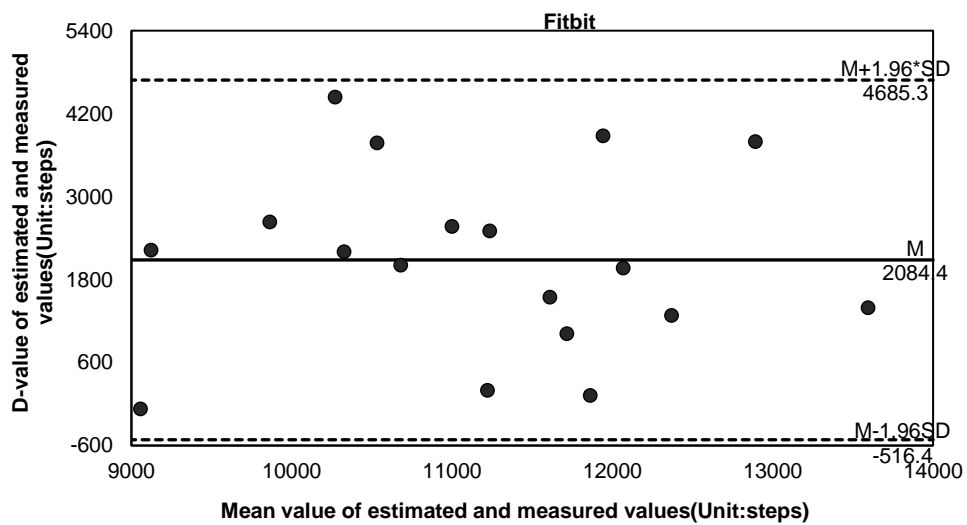

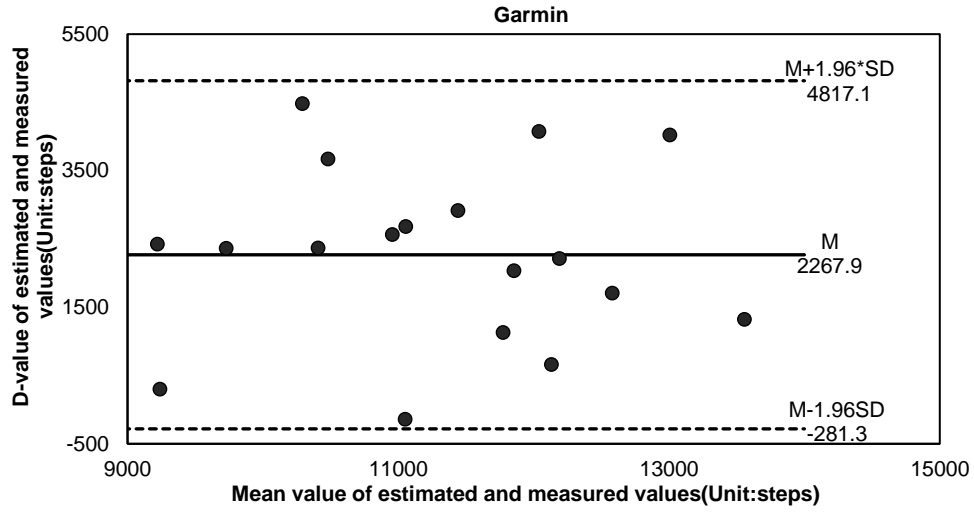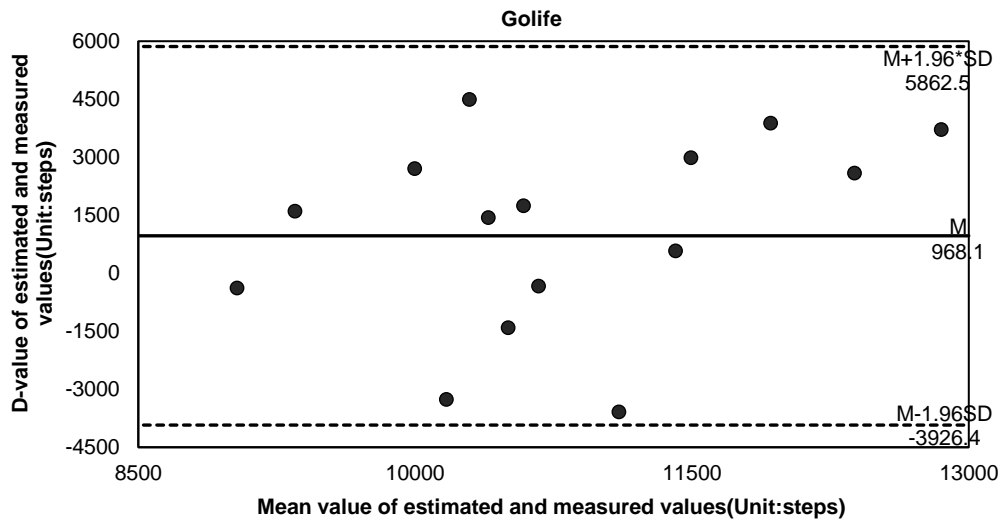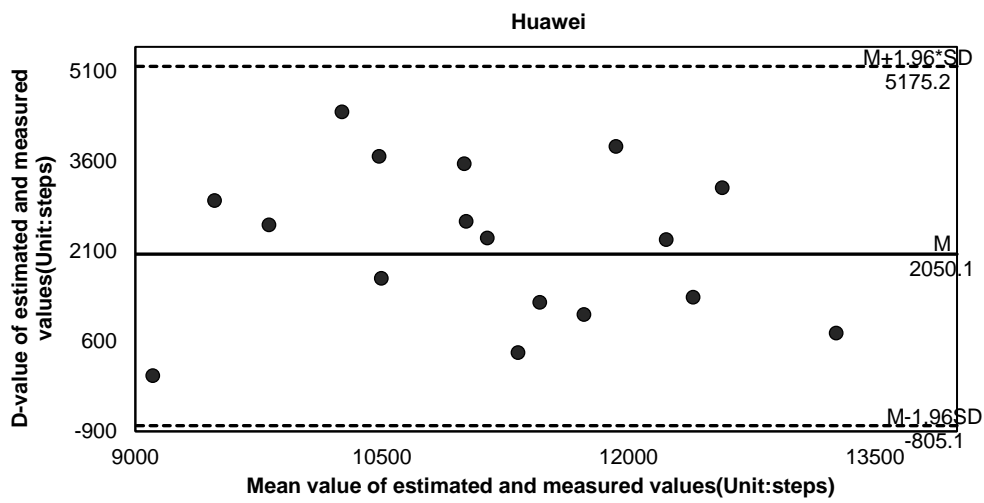

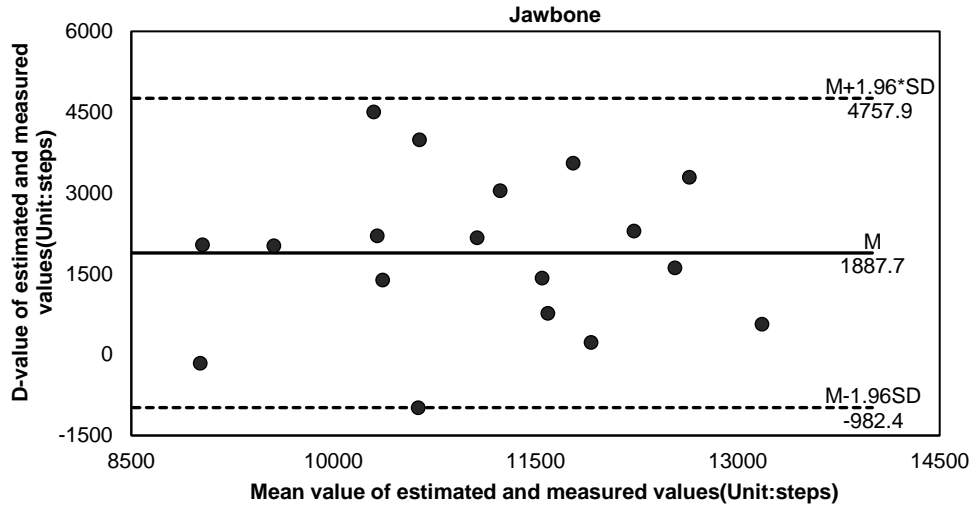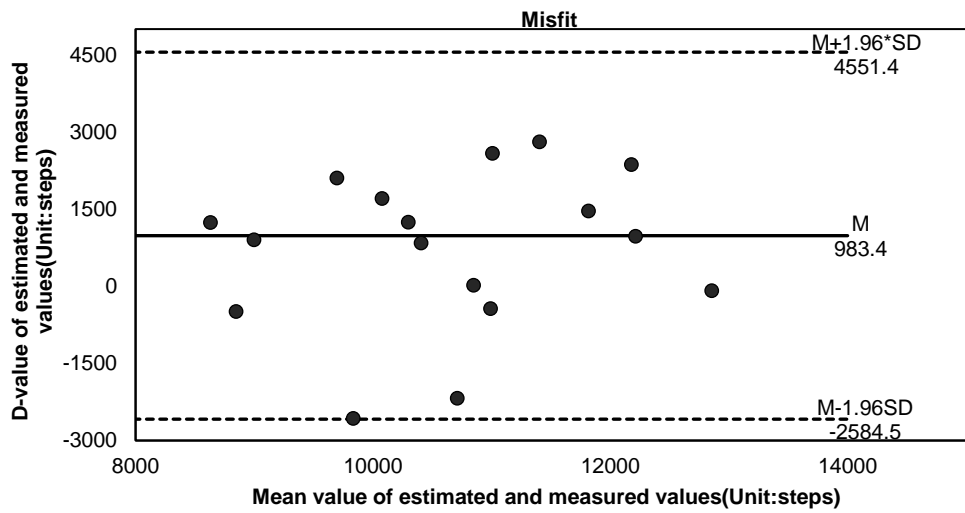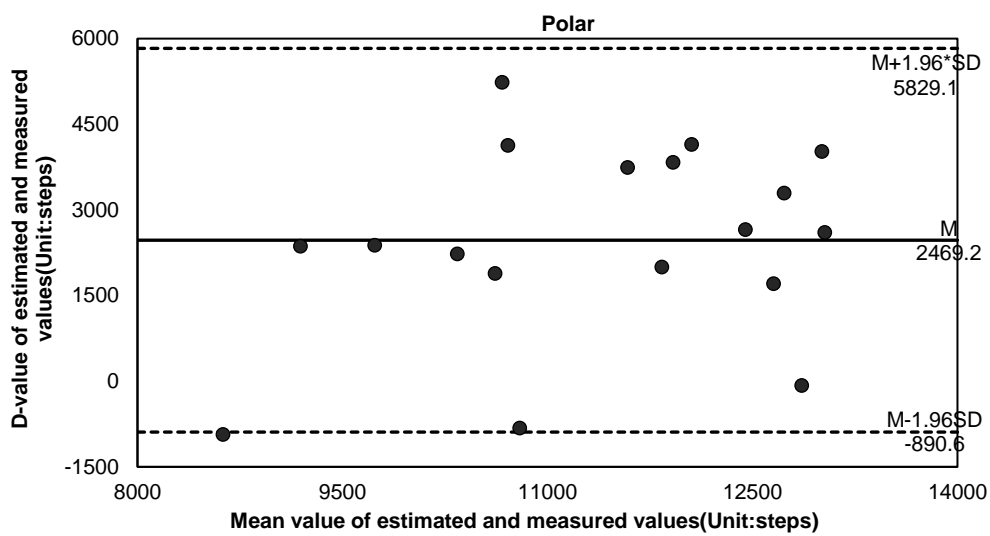

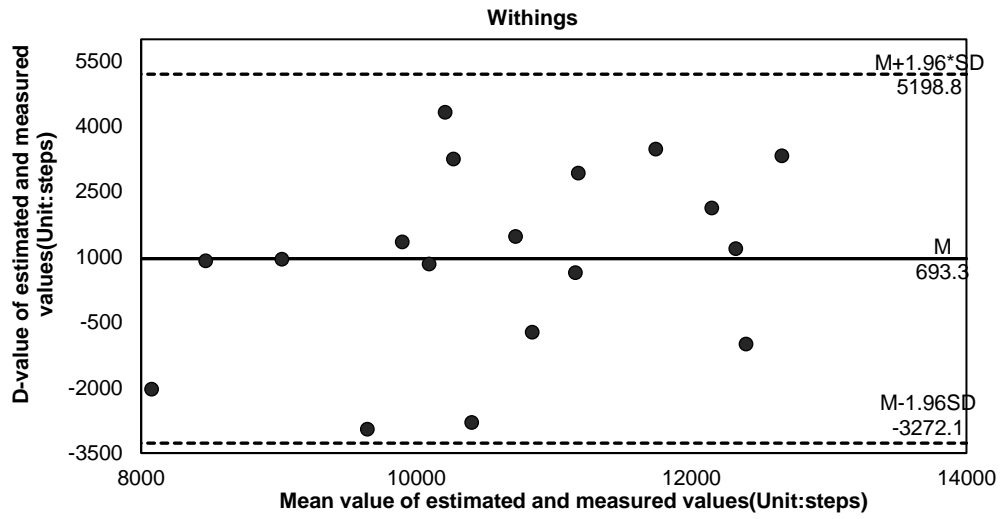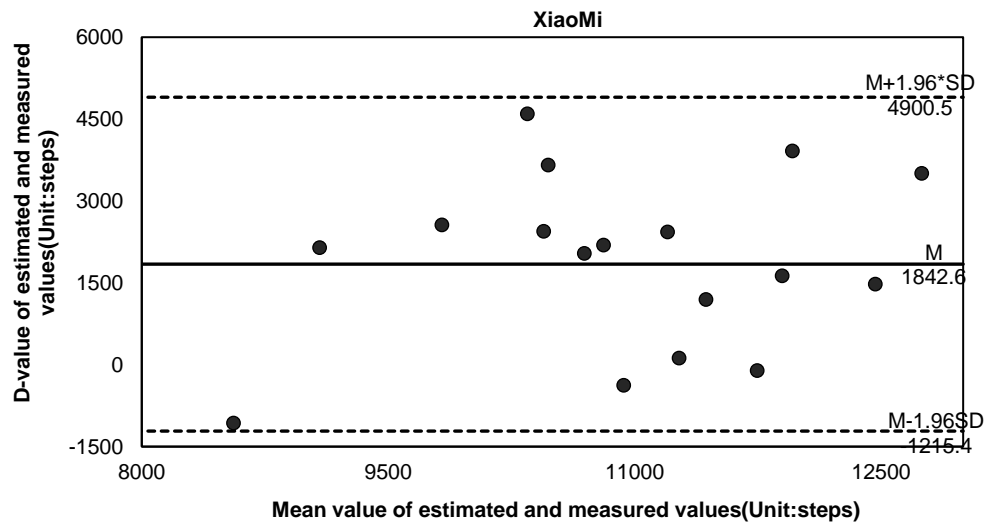

a

**Energy expenditure:**

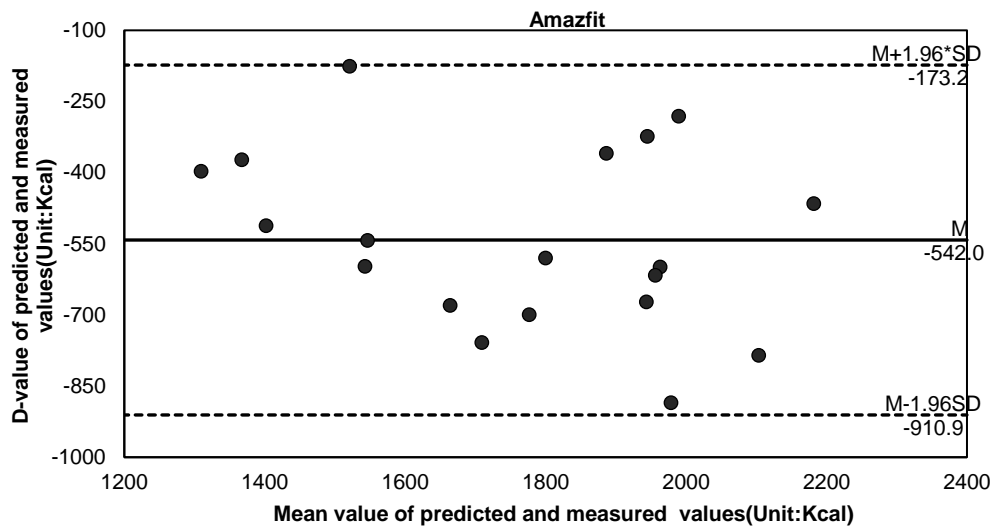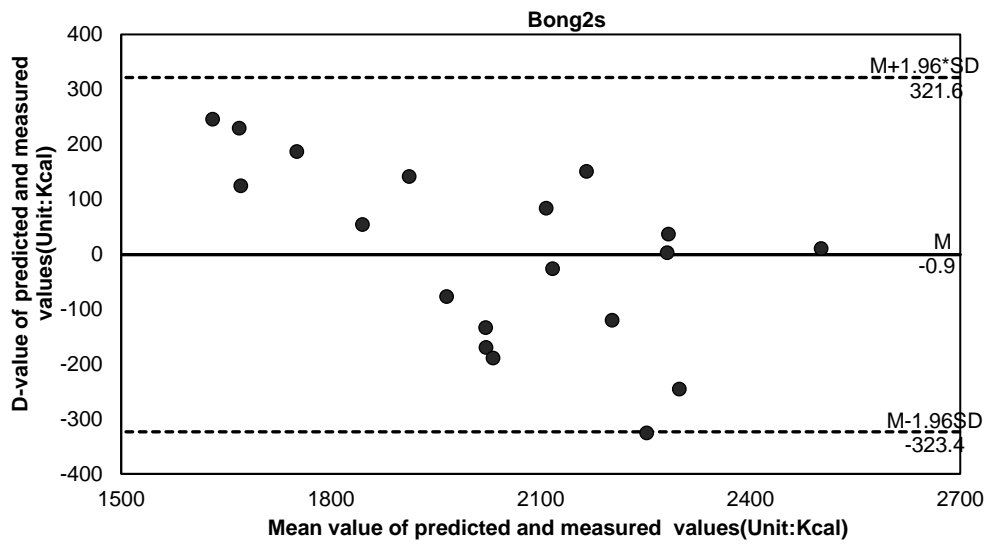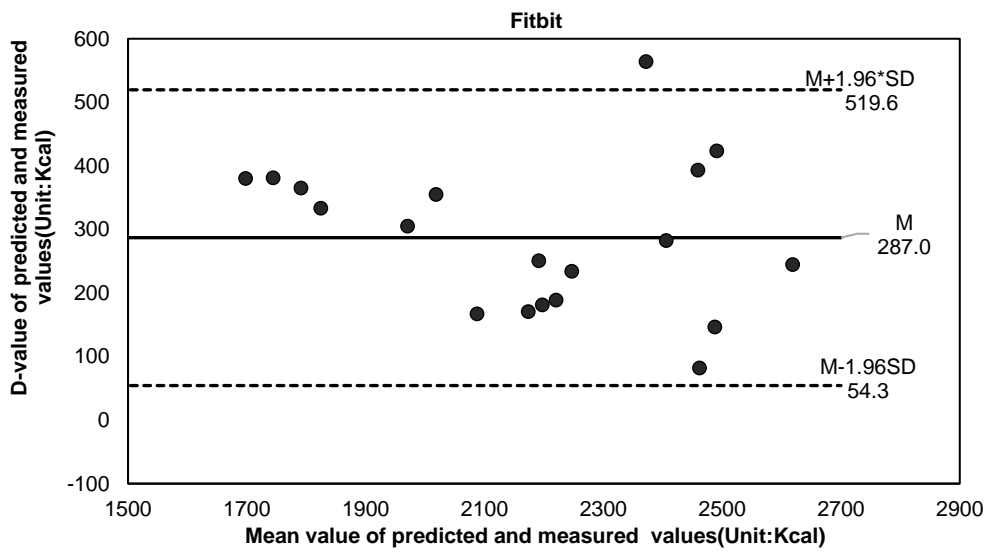

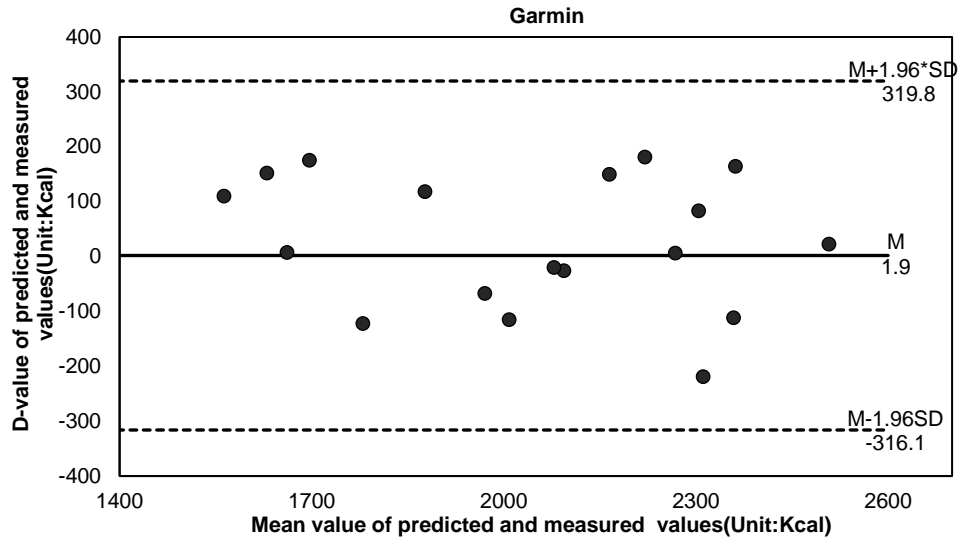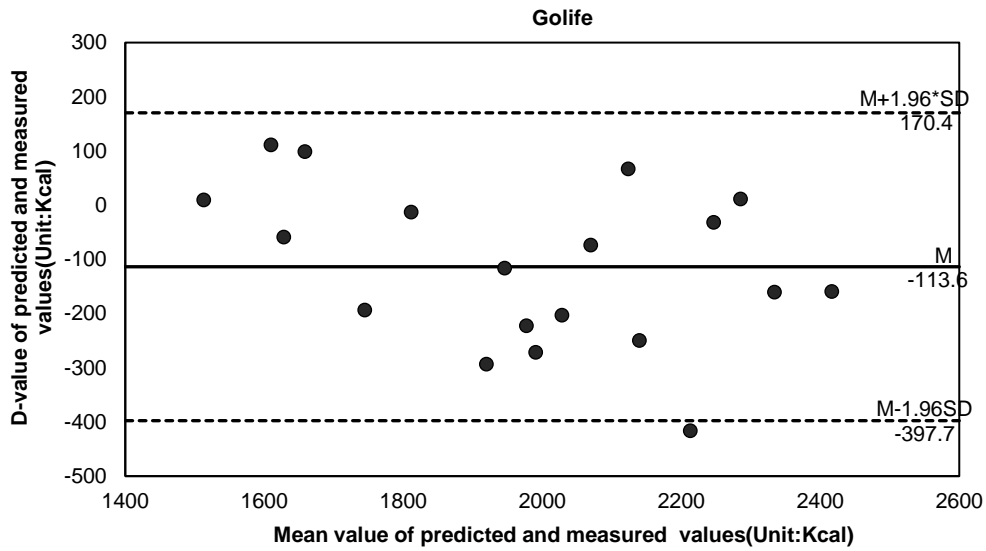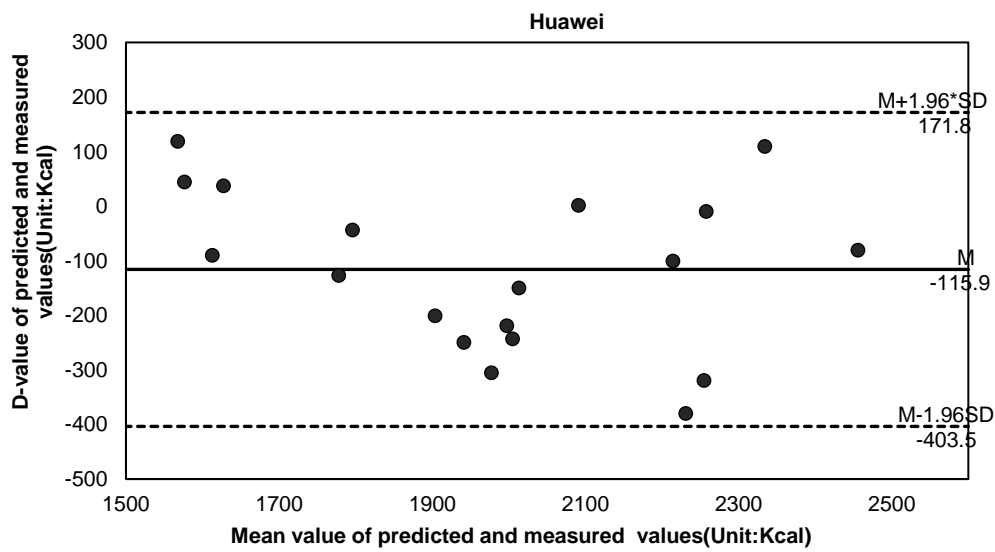

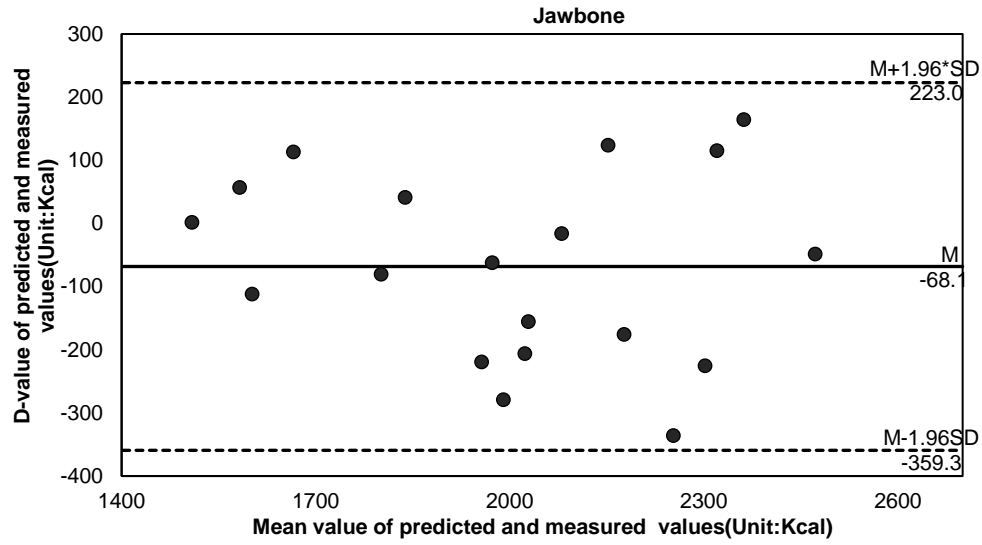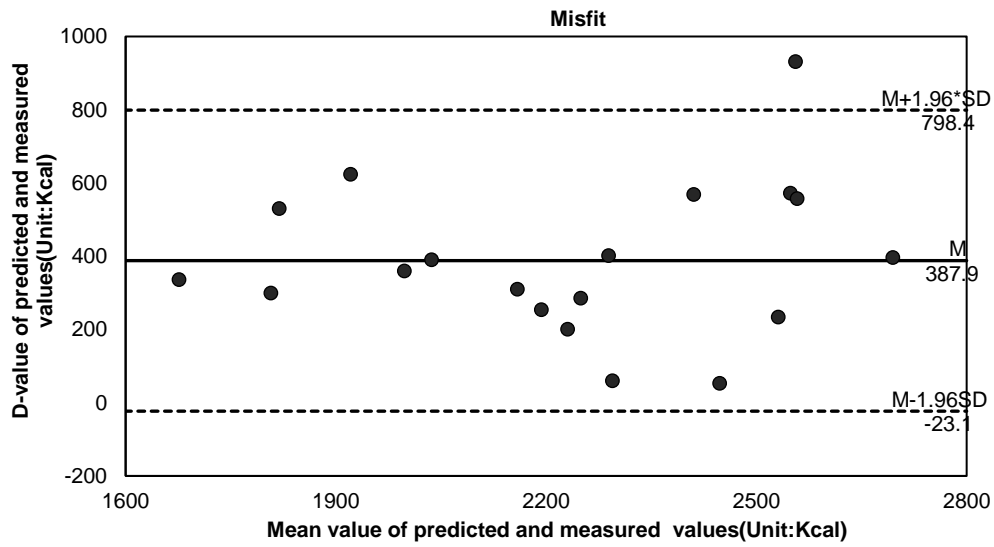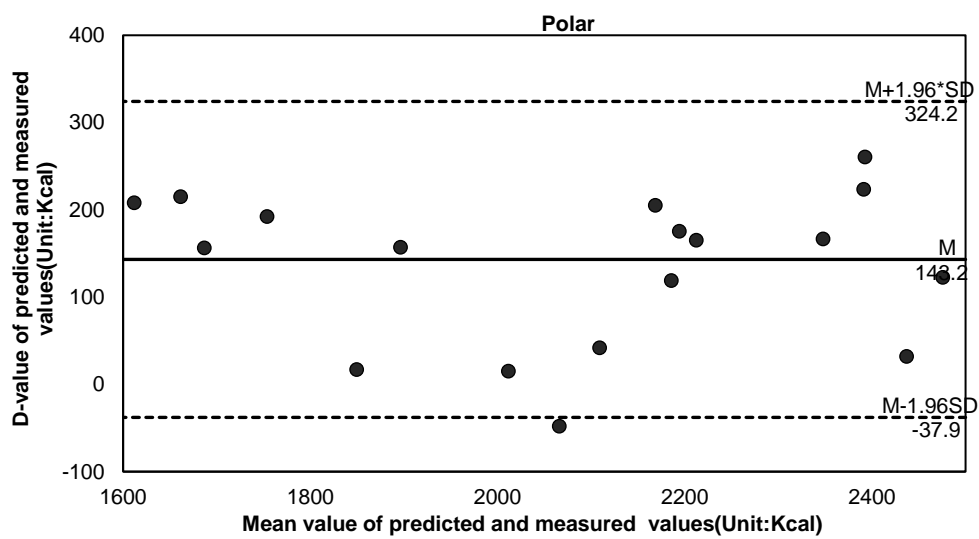

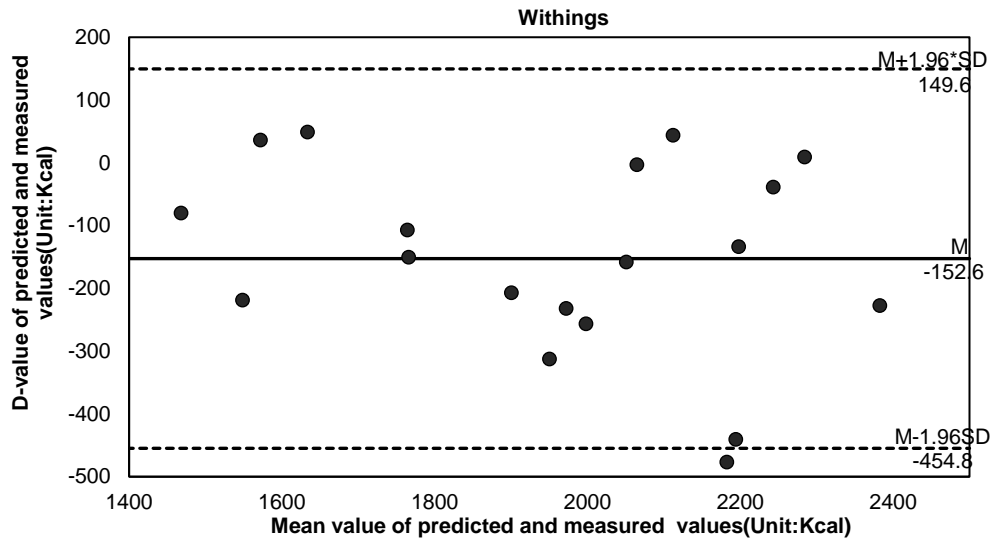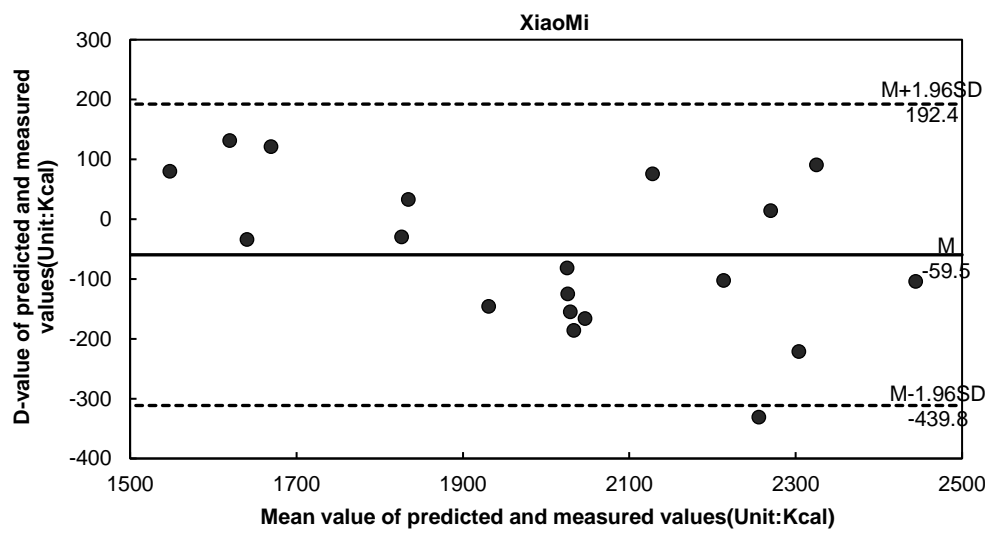

**b**

Figure S1 The Bland-Altman scatterplot of each wrist-wearable activity devices for steps and total energy expenditure.
